# Supplementary material
Source: Springer Nature journal article supplement (https://www.springermedizin.de/resource/supplementary/12888_2008_565_MOESM5_ESM.pdf/9483614)

A

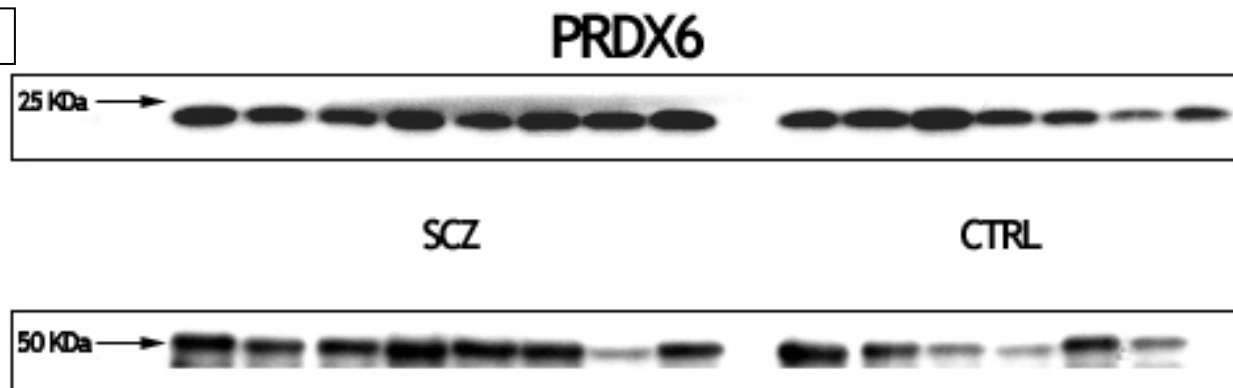

B

**Peroxioredoxin 6  
(PRDX6)**  
p=0.0491

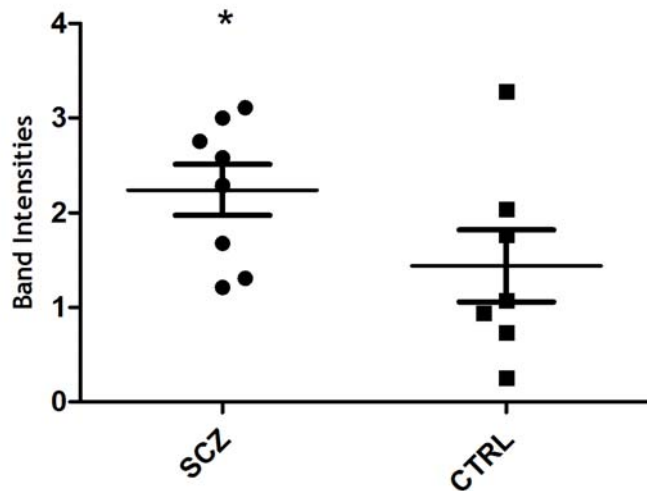

C

**Glial Fibrillary Acidic Protein  
(GFAP)**  
p=0.0192

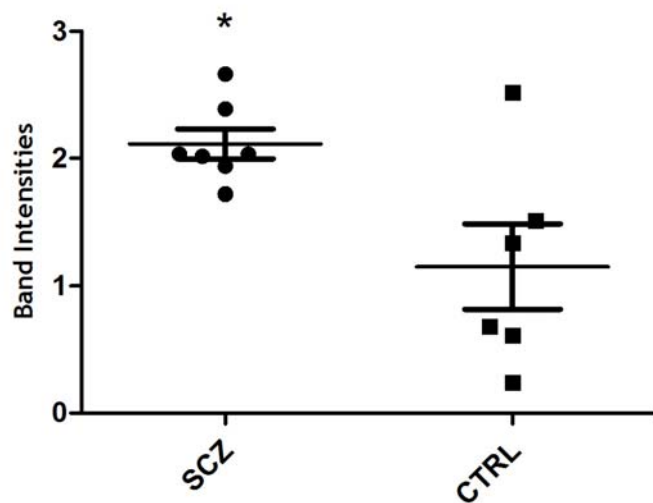

Supplement: MOESM5 [file 9483614]
